# Supplementary material
Source: PubMed Central journal article supplement (PMC8551056)
Supplement: NIHMS1737985-supplement-1.pdf [file NIHMS1737985-supplement-1.pdf]

# Figure S1

## a ZMEL1 Boyden Chamber

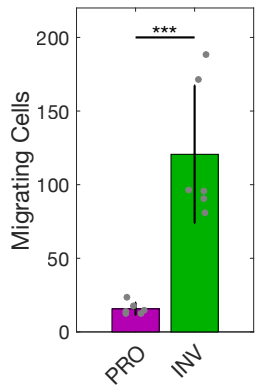

## b ZMEL1 MSD vs. Tau

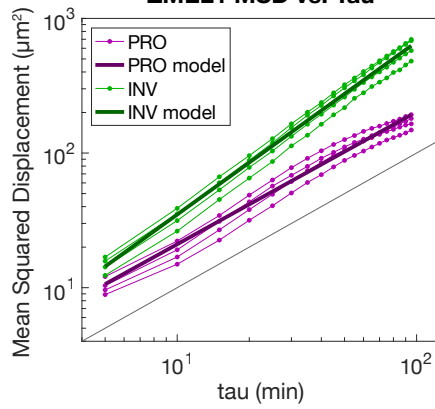

## c Hoek INV

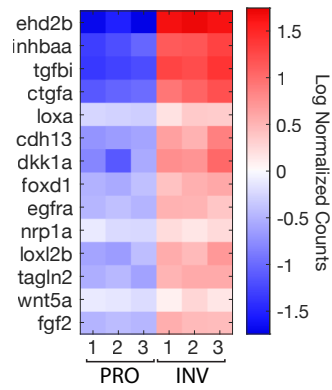

## d ZMEL1 3dpt Overall Metastasis

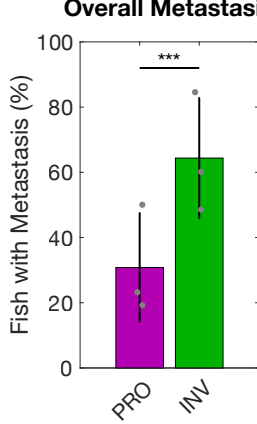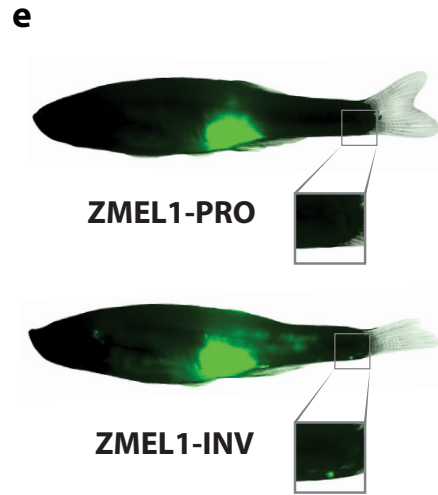

## f Overall Metastasis

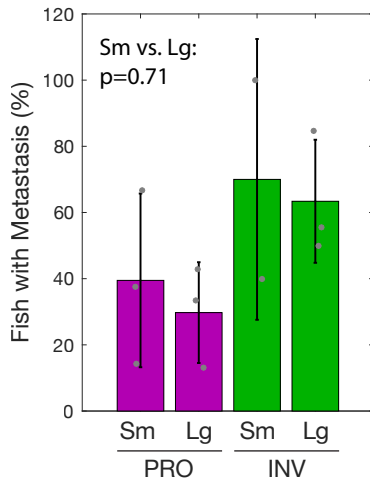

## g Caudal Metastasis

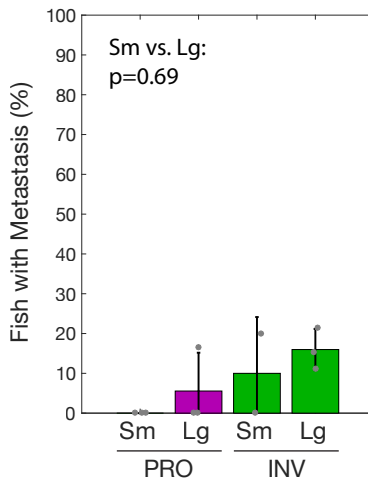

**Figure S1. PRO and INV coexist in zebrafish melanoma, with INV cells metastasizing more frequently due to increased extravasation (Related to Figure 1)**

**a.** Number of ZMEL1 cells migrating in Boyden Chamber assay ( $p < 0.001$  by linear regression,  $N = 3$  independent experiments for each of 2 fluorophores). **b.** Log-log plot of mean squared displacement (MSD) vs. lag time ( $\tau$ ) over the range of  $5 \leq \tau < 100$  minutes with model fits overlaid ( $N = 4$  independent experiments, see Methods for details). The slope ( $\alpha$ ) provides quantification of the persistence of motility, where a cell moving randomly will have  $\alpha = 1$ , and a cell moving along a straight line will have  $\alpha = 2$  (Gorelik and Gautreau, 2014). Black line with  $\alpha = 1$  is shown for comparison. **c.** Heatmap of genes in the Hoek INV signature that are differentially expressed in ZMEL1-INV vs. -PRO ( $\log_2$  fold change cutoff  $\pm 1.5$ ,  $p_{\text{adj}} < 0.05$ ). As in Figure 1e, but with zebrafish gene names. **d.** Quantification of overall distant metastases seeded by ZMEL1 populations at 3 dpt (OR [95% CI]: 4.49 [1.94, 10.43];  $p < 0.001$  by logistic regression;  $N = 3$  independent experiments with PRO/INV 10/10, 31/33, and 13/13 fish per group, respectively;  $n = 110$  fish total; plot shows mean  $\pm$  SD). **e.** Representative images of ZMEL1-PRO and -INV tumors and distant metastases (e.g. to caudal region [box]) at 3 days post-transplant (3dpt). **f-g.** Quantification of (f) overall metastasis and (g) caudal metastasis seeded by ZMEL1 populations at 3dpt stratified by primary tumor size (small vs. large).  $p = 0.71$  for overall metastasis and  $p = 0.69$  for caudal metastasis for comparison of small vs. large primary tumors by logistic regression; plot shows mean  $\pm$  SD.

**Figure S2**

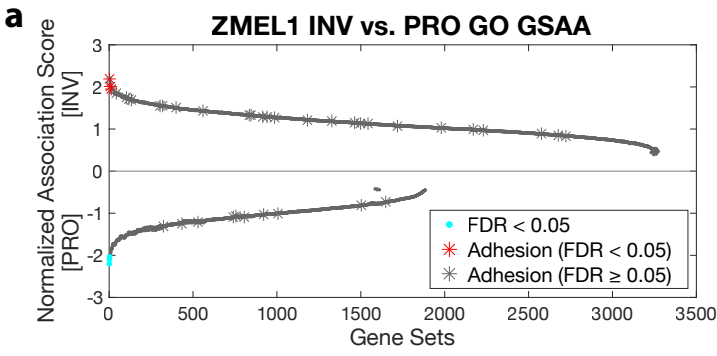

**b** GO Adhesion

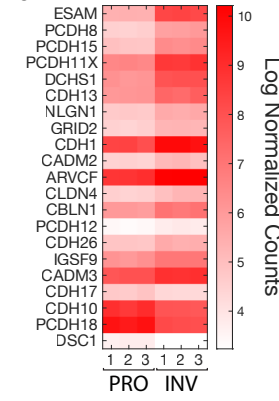

**c** GO Adhesion

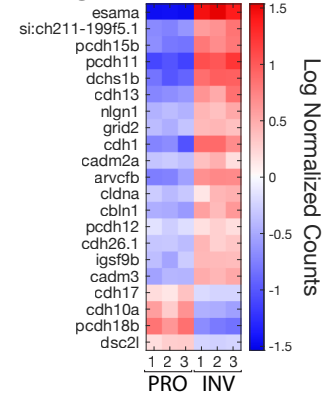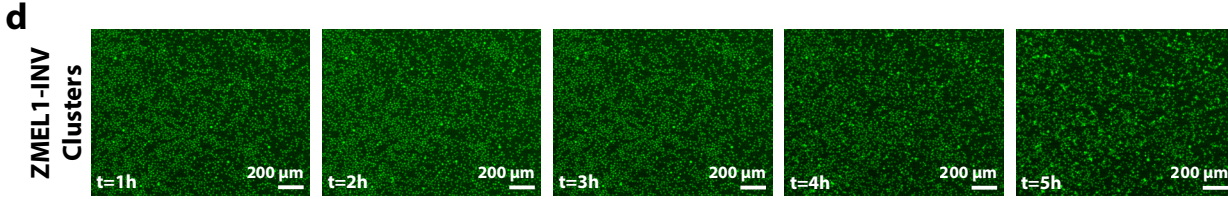

**e** Cluster Size Variation

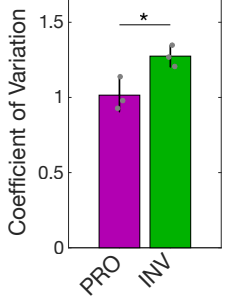

**f** CCLE

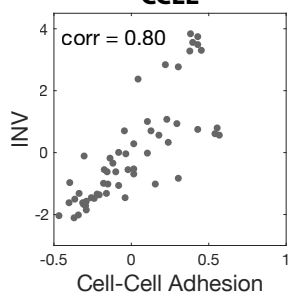

**g** TCGA

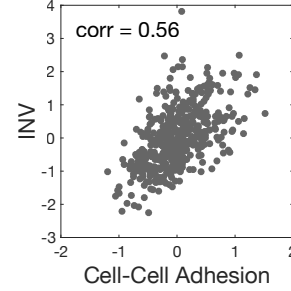

**h** Surface

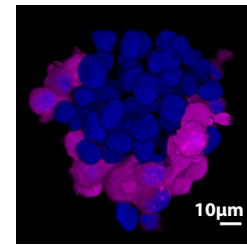

**Central Slice**

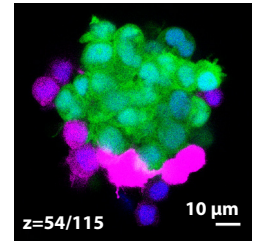

ZMEL1 PRO : INV  
Hoechst 33342

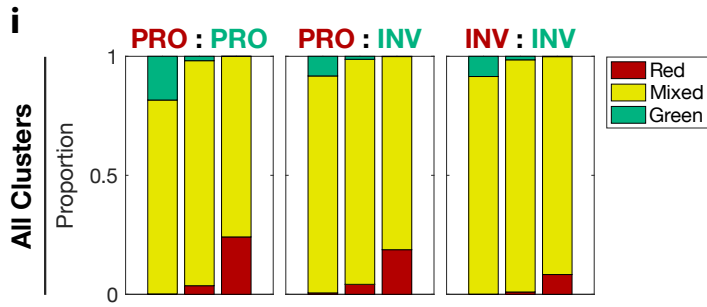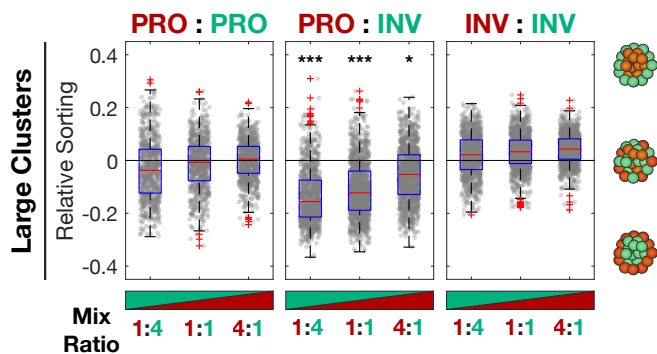

**j** ZMEL1-INV Clusters

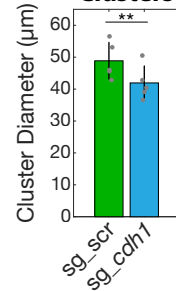

**m**

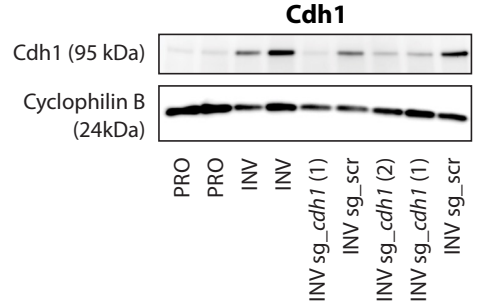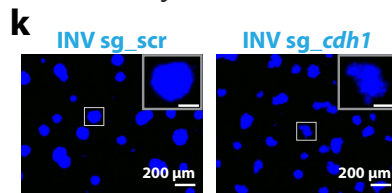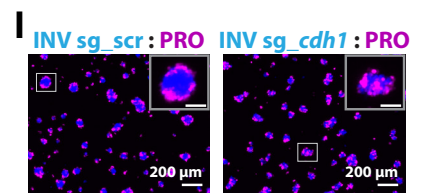

**n** Metastasis

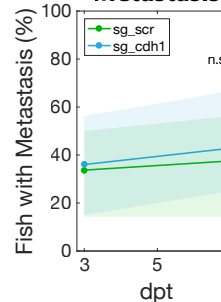

**o** Caudal Metastasis

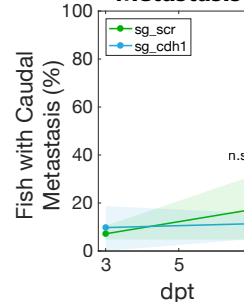

**Figure S2. Cluster formation by INV state drives spatial patterning of melanoma clusters**  
**(Related to Figure 2)**

**a.** Dual waterfall plot of all gene sets from GO analysis. Adhesion GO gene sets are indicated with an asterisk and colored according to false discovery rate (FDR). **b-c.** Heatmap of genes in adhesion GO gene sets (FDR < 0.05, n=3) that are differentially expressed between ZMEL1-PRO and -INV (log<sub>2</sub> fold change cutoff ± 1.5, p<sub>adj</sub> < 0.05). As in Figure 2b, but with (b) absolute expression data, and (c) zebrafish gene names. **d.** Representative images of early stages of ZMEL1-INV cluster formation in Figure 2d. Times are calculated from initial plating of assay. **e.** Quantification of coefficient of variation (CV =  $\sigma/\mu$ , where  $\sigma$  is the population standard deviation and  $\mu$  the population mean) of cluster area of individual PRO and INV clusters at 2 days (p=0.026 by two-tailed t-test, N=3 independent experiments). **f-g.** Human melanoma samples from (f) The Cancer Cell Line Encyclopedia (CCLE, n=56) and (g) The Cancer Genome Atlas (TCGA) melanoma (SKCM, n=472) cohort are plotted as INV (Hoek et al., 2006) versus Cell-Cell Adhesion scores calculated from RNA-seq. Pearson correlation coefficient between scores is shown. **h.** (left) Composite 3D opacity rendering and (right) central slice of confocal imaging through co-cluster of ZMEL1-PRO and ZMEL1-INV. **i.** Quantification of (top) mixing and (bottom) sorting of heterotypic ZMEL1 clusters as in Figure 2f. Red (tdTomato) and green (EGFP) labeled ZMEL1 cells were mixed PRO:PRO, PRO:INV, and INV:INV at indicated ratios. (top) Quantification of all clusters revealed that nearly all clusters mix, regardless of cell type. (bottom) Spatial sorting was significantly enriched in PRO:INV clusters compared to PRO:PRO and INV:INV controls (p<0.001, p<0.001, and p=0.038 for 1:4, 1:1, and 4:1, respectively, by one-way ANOVA on mean of each replicate versus respective PRO:PRO and INV:INV controls [greater of two p-values reported]). **j.** Cluster size after 2 days in ZMEL1-INV with CRISPR deletion of *cdh1* (*sg\_cdh1*)



versus control (sg\_scr) ( $p=0.0016$ , two-tailed paired t-test,  $N=5$  independent experiments). **k.** Representative images of effect of sg\_cdh1 versus sg\_scr on cluster size at 3 days (inset scale 50  $\mu\text{m}$ ). **l.** Representative composite images of mixing effects of sg\_cdh1 versus sg\_scr. Control (sg\_scr) ZMEL1-INV cells mixed with ZMEL1-PRO show clear spatial sorting, whereas sg\_cdh1 ZMEL1-INV cells mixed with ZMEL1-PRO demonstrate decreased sorting (inset scale 50  $\mu\text{m}$ ). **m.** Western blot confirmed two different sg\_cdh1's decreased Cdh1 protein expression in ZMEL1-INV to a level comparable to ZMEL1-PRO. sg\_cdh1 (1) was utilized for all phenotypic experiments. **n-o.** ZMEL1-INV orthotopic primary tumors with sg\_cdh1 do not seed (n) distant metastases and (o) caudal metastases in a significantly different percentage of zebrafish than with sg\_scr control ( $p=0.56$  and  $p=0.44$ , respectively, at 7 dpt by logistic regression;  $N=3$  independent experiments with sg\_scr/sg\_cdh1 16/15, 21/20, 19/19 fish per group, respectively;  $n=110$  fish total).

**Figure S3**

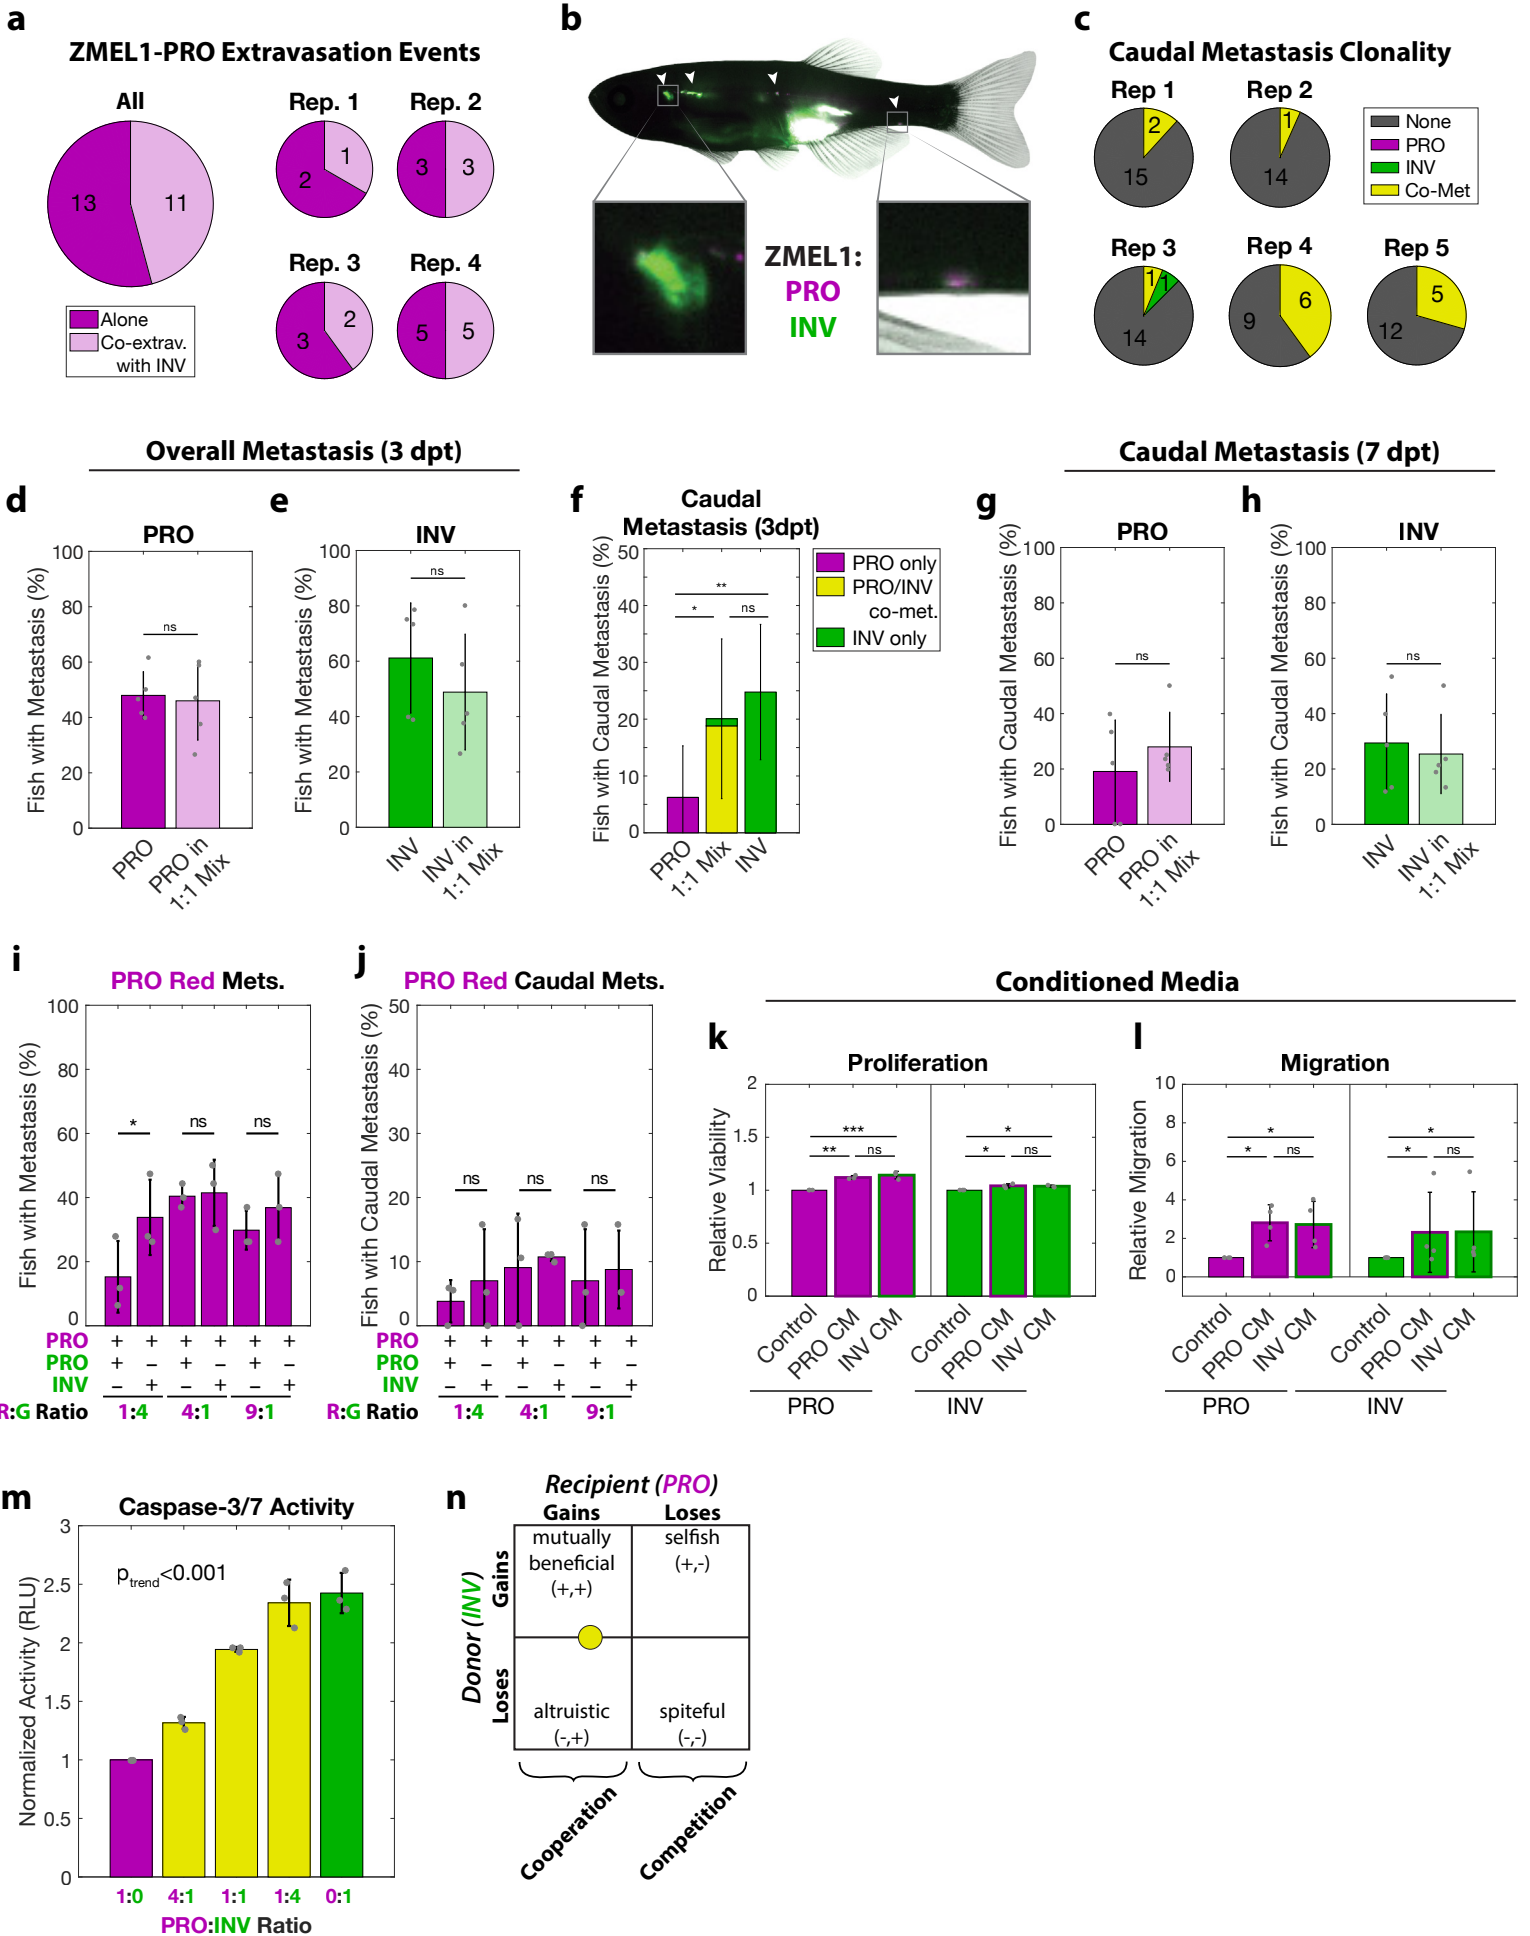

**Figure S3. PRO and INV cooperate in metastasis via co-extravasation (Related to Figure 3)**

**a.** Number of observed extravasation events of ZMEL1-PRO either alone or in the form of co-extravasation with ZMEL1-INV following intravenous transplant ( $p=0.18$  by two-tailed paired t-test,  $N=4$  independent experiments with 14, 15, 22, and 22 fish each;  $n=73$  fish total). **b.** Composite image of adult zebrafish with orthotopic transplants of 1:1 mixtures of ZMEL1-PRO and -INV seed polyclonal metastases (arrowheads), including to the kidney and caudal regions (left and right boxes, respectively). **c.** Number of fish co-transplanted with a 1:1 mixture of ZMEL1-PRO and -INV that have no caudal metastases (None), caudal metastases comprised of exclusively PRO or INV, or caudal metastases formed by co-metastasis (Co-Met) of both cell types ( $N=5$  independent experiments with 17, 15, 16, 15, and 17 fish each; 80 fish total;  $p<0.001$  by Mantel-Haenszel's test for null hypothesis of no interaction; as in Figure 3c for each independent experiment). **d.** ZMEL1-PRO and **e.** ZMEL1-INV showed similar levels of overall metastasis at 3 dpt in mixed tumors compared to when each was transplanted alone ( $p=0.83$  and  $p=0.13$ , respectively, by logistic regression). **f.** Proportion of fish with caudal ZMEL1-PRO only, ZMEL1-INV only, or PRO/INV co-metastasis (co-met) at 3dpt (PRO vs. INV:  $p=0.0054$ ; "PRO only" in PRO vs. 1:1 mix:  $p=0.033$ ; "INV only" in INV vs. 1:1 mix:  $p=0.49$ ; all by logistic regression). Alternate presentation of data in Figure 3d-e. **g-h.** (g) ZMEL1-PRO and (h) ZMEL1-INV showed similar levels of caudal metastasis at 7 dpt in mixed tumors compared to when each was transplanted alone ( $p=0.54$  and  $p=0.63$ , respectively, by logistic regression). For **b-h:**  $N=5$  independent experiments with PRO/MIX/INV 18/17/18, 13/15/14, 15/16/15, 12/15/15, and 15/17/16 fish per group, respectively; 231 fish total; plots show mean  $\pm$  SD ). **i-j.** Adult zebrafish were orthotopically transplanted with an equivalent final concentration of tdTomato-labeled ZMEL1-PRO mixed at a 1:4, 4:1, or 9:1 ratio with EGFP-labeled ZMEL1-PRO or ZMEL1-INV. tdTomato-labeled ZMEL1-PRO (i)

overall metastases and (j) caudal metastases were quantified 3dpt to measure the impact of cooperation with ZMEL1-INV. ZMEL1-PRO metastasized more when co-transplanted with ZMEL1-INV than with ZMEL1-PRO in Red:Green 1:4 transplants (OR [95% CI]: 2.78 [1.09, 7.10];  $p=0.032$  by logistic regression). A total of  $N=3$  independent variable ratio mixing experiments were performed, each with at least 16 fish per group ( $n=108/113/113$  fish per replicate;  $n=334$  fish total). **k-l.** Proliferation (k) and Boyden chamber migration (l) were quantified in ZMEL1-PRO and -INV cells with or without conditioned media (CM) from ZMEL1-PRO and -INV cells ( $p$ -values by linear regression;  $N=3$  independent experiments for proliferation;  $N=4$  independent experiments for migration). **m.** Caspase-3/7 activity normalized to cell number for clusters of indicated ratio of ZMEL1-PRO and -INV cells at 2 days.  $P$ -value for trend of normalized caspase-3/7 activity with increasing INV composition by linear regression (adjusted  $R$ -squared 0.91). **n.** The interaction between INV (donor) and PRO (recipient) cells can be schematically represented as a donor-recipient interaction (Hauser et al., 2009) falling into a regime of cooperation.

**Figure S4**

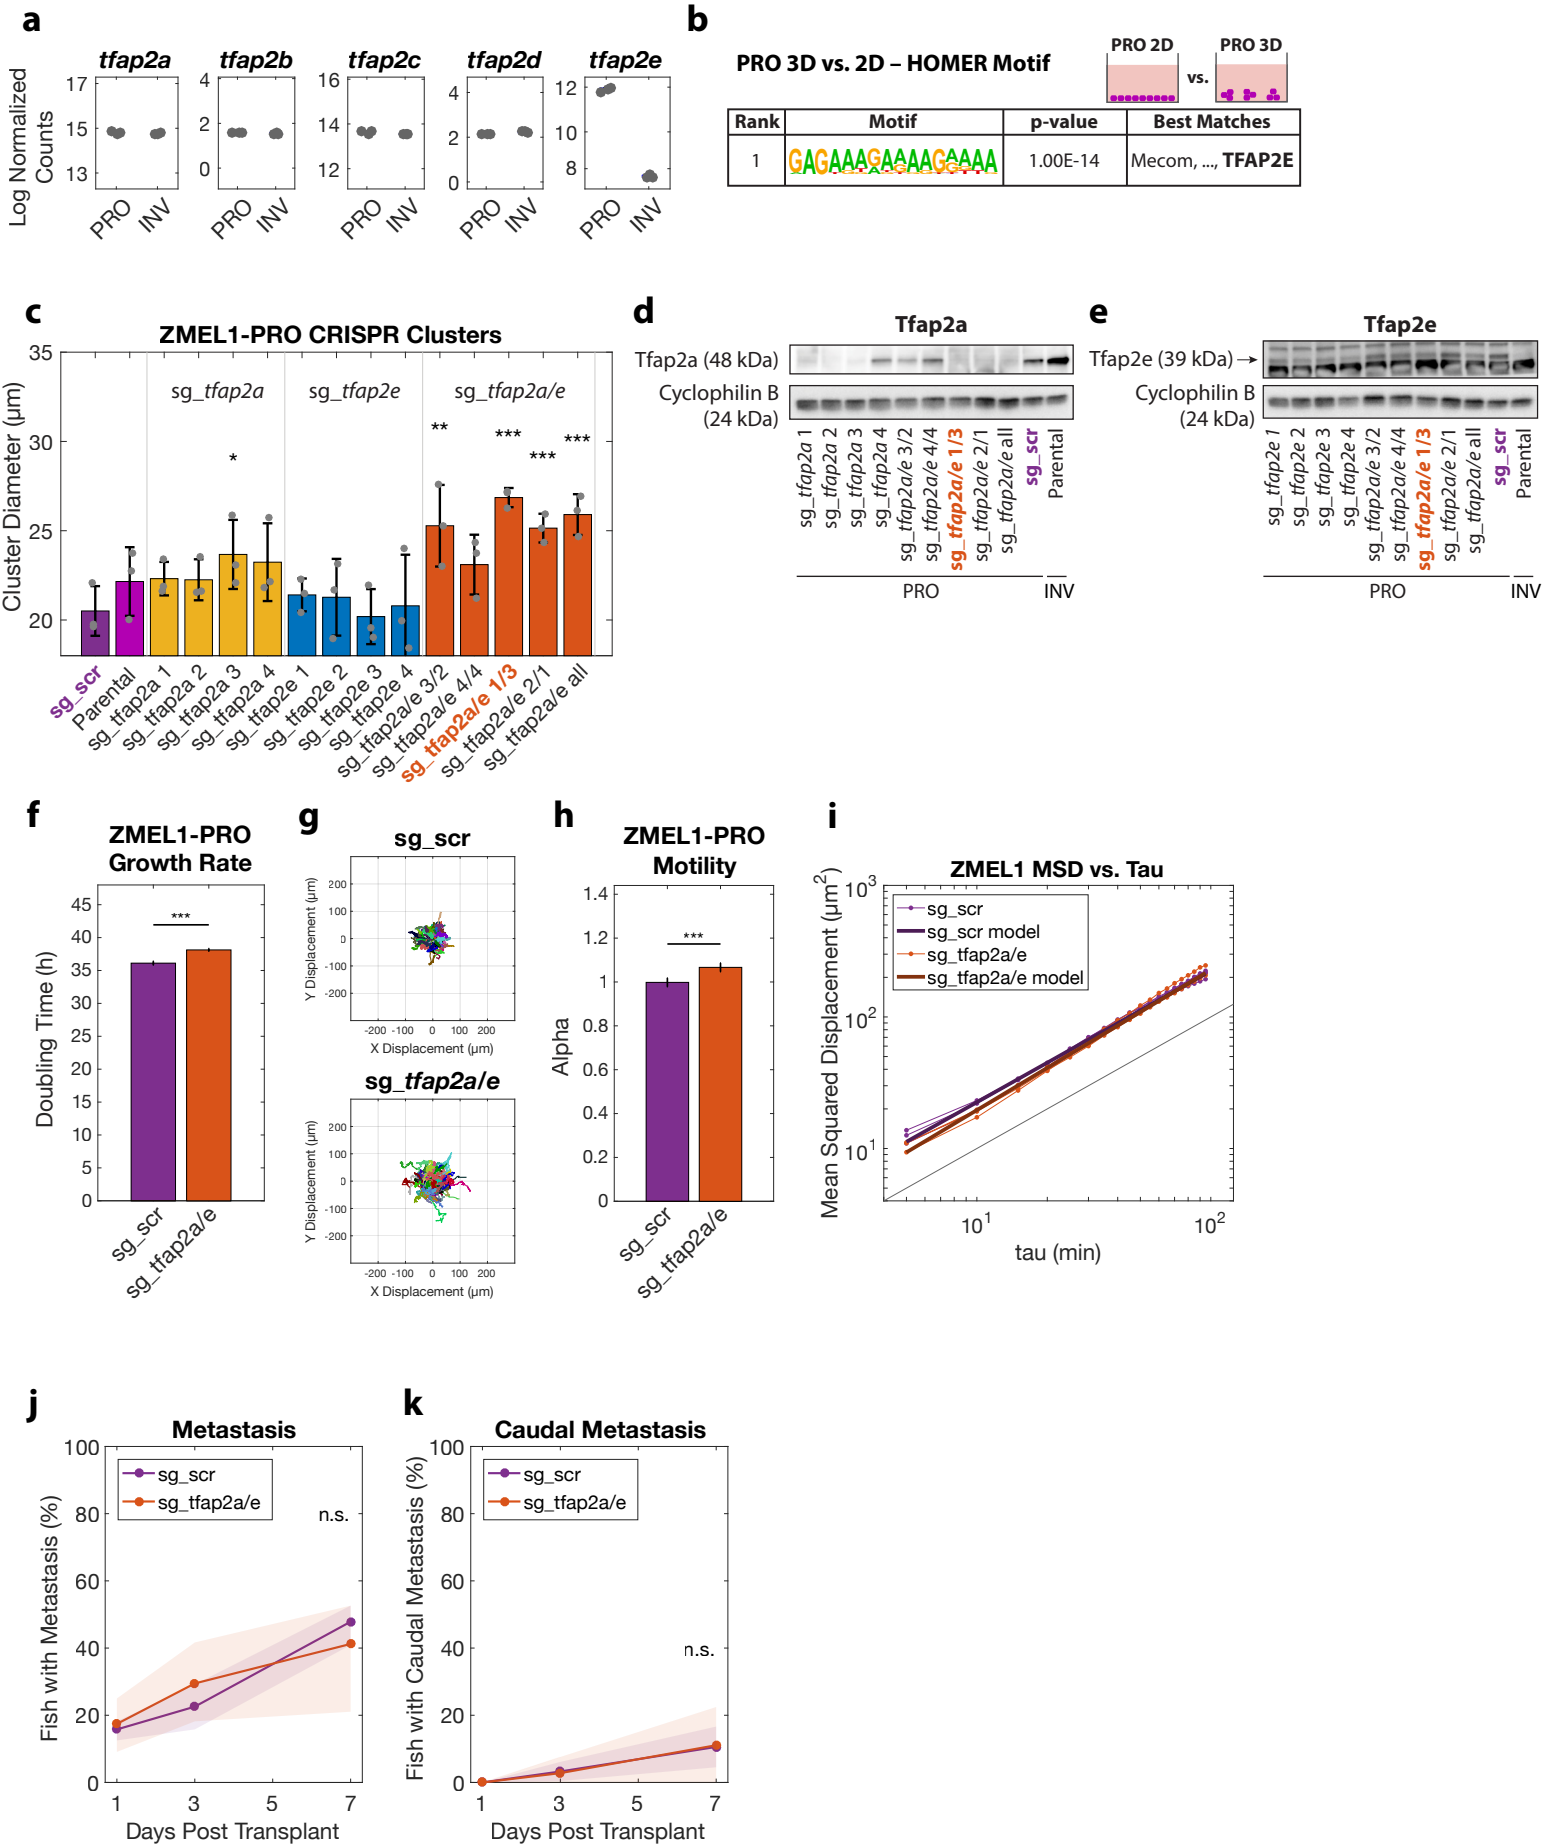

**Figure S4. TFAP2 distinguishes PRO vs. INV state and modulates clustering and metastasis**  
**(Related to Figure 4)**

**a.** Boxplots of *tfap2a-e* expression from RNA-seq of ZMEL1-PRO and -INV. **b.** HOMER de-novo motif analysis of genes differentially expressed between ZMEL1-PRO in 3D (clusters) vs. 2D (no clusters) ( $\log_2$  fold change cutoff  $\pm 1.5$ ,  $p_{\text{adj}} < 0.05$ ,  $\pm 500$ bp of transcription start site [TSS]). **c.** Cluster size in ZMEL1-PRO with CRISPR-Cas9 inactivation of *tfap2a* or *tfap2e* alone and in combination (p-values by linear regression; N=3 independent experiments). sgRNAs highlighted in purple (sg\_scr) and orange (sg\_ *tfap2a/e* 1/3) were used for further experiments (Figures 4,5 and Figures S4,S5). **d-e.** Western blot confirmation of CRISPR inactivation of (d) *tfap2a* and (e) *tfap2e* with each sgRNA or combination of sgRNAs. **f-i.** Tracking of individual cells by time-lapse microscopy (N=3 independent experiments). **f.** ZMEL1-PRO with sg\_ *tfap2a/e* has slowed growth versus sg\_scr ( $p < 0.001$  by linear regression, model estimates  $\pm 95\%$  CI shown). **g.** Representative displacements of 500 tracks per sgRNA. **h.** Model estimates  $\pm 95\%$  CI for alpha, the slope of the log-log plot of mean squared displacement vs. lag time ( $\tau$ ) for each ZMEL1-PRO sg\_ *tfap2a/e* and sg\_scr ( $p < 0.001$  by linear regression). Larger alpha indicates more persistent motion. **i.** Log-log plot of mean squared displacement (MSD) vs. lag time ( $\tau$ ) over the range of  $5 \leq \tau < 100$  minutes with model fits overlaid (see Methods for details). The slope ( $\alpha$ ) provides quantification of the persistence of motility, where a cell moving randomly will have  $\alpha=1$ , and a cell moving along a straight line will have  $\alpha=2$  (Gorelik and Gautreau, 2014). Black line with  $\alpha=1$  is shown for comparison. **j-k.** ZMEL1-PRO orthotopic primary tumors with sg\_ *tfap2a/e* do not seed (j) distant metastases and (k) caudal metastases in a significantly different proportion of zebrafish than with sg\_scr control ( $p=0.44$  and  $p=0.90$ , respectively, at 7 dpt by logistic regression; N=3 independent

experiments with sg\_scr/sg\_tfap2a/e 24/22, 22/22, 24/24 fish per group, respectively; n=138 fish total).

**Figure S5**

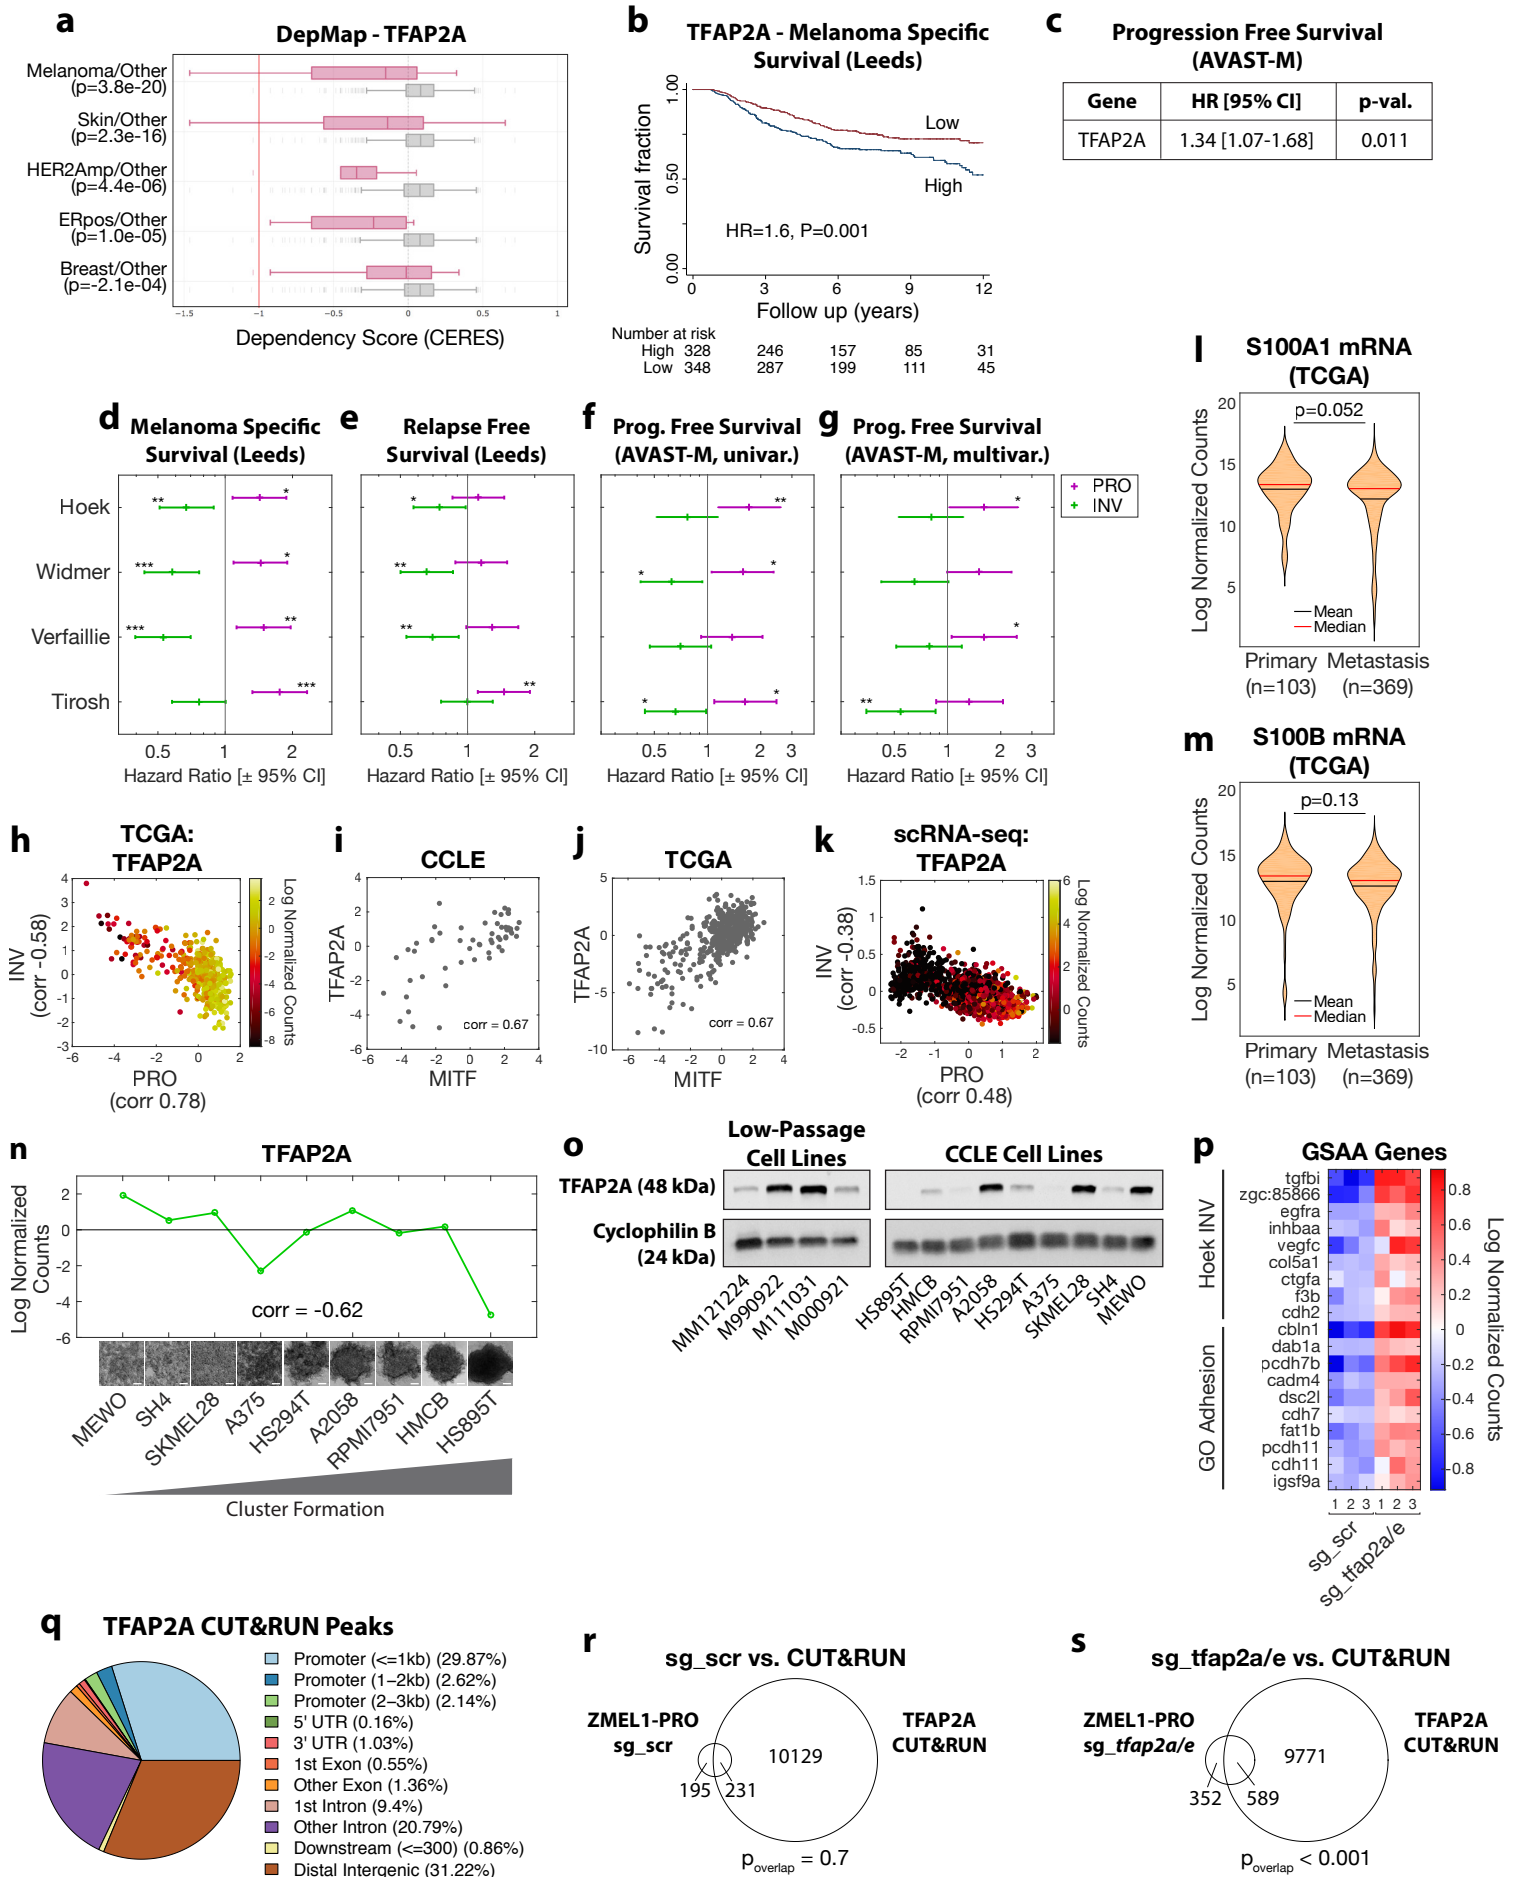



**Figure S5. TFAP2 correlates with clustering in human melanoma and regulates genes associated with metastasis and cell-cell adhesion (Related to Figure 5)**

**a.** Analysis of TFAP2A in the Dependency Map (DepMap, CRISPR (Avana) Public 19Q3) dataset reveals a dependence of melanoma proliferation on TFAP2A. **b-c.** High TFAP2A mRNA expression in primary tumors predicts worse (b) melanoma specific survival in patients in the Leeds Melanoma Cohort (HR [95% CI]: 1.6 [1.2, 2.1],  $p=0.001$  upper vs. lower half by Cox proportional hazards and (c) progression free survival in patients in the AVAST-M Melanoma Cohort (multivariate Cox regression model). **d-g.** Primary tumors with high PRO or low INV expression are associated with worse outcomes in patients in (d-e) the Leeds Melanoma Cohort and (f-g) the AVAST-M Melanoma Cohort. **h.** Human melanoma samples from The Cancer Genome Atlas (TCGA) melanoma (SKCM,  $n=472$ ) cohort are plotted as PRO and INV scores (Hoek et al., 2006) calculated from RNA-seq and colored according to TFAP2A mRNA expression. Pearson correlation coefficients between TFAP2A and PRO/INV scores are shown on axes. **i-j.** Expression of TFAP2A and MITF in human melanoma samples from (i) CCLE ( $n=56$ ) and (j) TCGA melanoma (SKCM,  $n=472$ ) cohort are plotted with Pearson correlation coefficient. **k.** Individual human melanoma cells are plotted as PRO and INV scores (Hoek et al., 2006) calculated from single-cell RNA-seq and colored according to TFAP2A mRNA expression (re-analyzed from Jerby-Arnon et al. (Jerby-Arnon et al., 2018)). Pearson correlation coefficients between TFAP2A and PRO/INV scores are shown on axes. **l-m.** (l) S100A1 and (m) S100B mRNA expression in The Cancer Genome Atlas (TCGA) melanoma (SKCM) cohort comparing primary tumors and metastases (p-values by Wilcoxon rank sum test with Bonferroni correction). **n.** Human melanoma cell lines ranked by cluster forming ability (left to right: low to high) demonstrate negative correlation between TFAP2A mRNA expression by RNA-seq and clustering

(Spearman correlation shown). **o.** Western blot analysis of TFAP2A expression in panels of (left) low-passage human melanoma cell lines and (right) human melanoma cell lines. **p.** Heatmap of top genes in Hoek INV and GO Adhesion gene sets that are differentially expressed between ZMEL1-PRO sg\_ *tfap2a/e* and sg\_ scr ( $\log_2$  fold change cutoff  $\pm 0.5$ ,  $p_{\text{adj}} < 0.05$ ). As in Figure 5f, but with zebrafish gene names. **q.** Distribution of TFAP2A CUT&RUN peaks as annotated by ChIPSeeker. **r-s.** Overlap of TFAP2A CUT&RUN peaks with genes upregulated in ZMEL1-PRO following CRISPR/Cas9 with (r) sg\_ scr ( $p=0.7$  by bootstrapping) and (s) sg\_ *tfap2a/e* ( $p<0.001$  by bootstrapping).

**Figure S6**

**a**

**Melanoma Patient CTC Clusters**

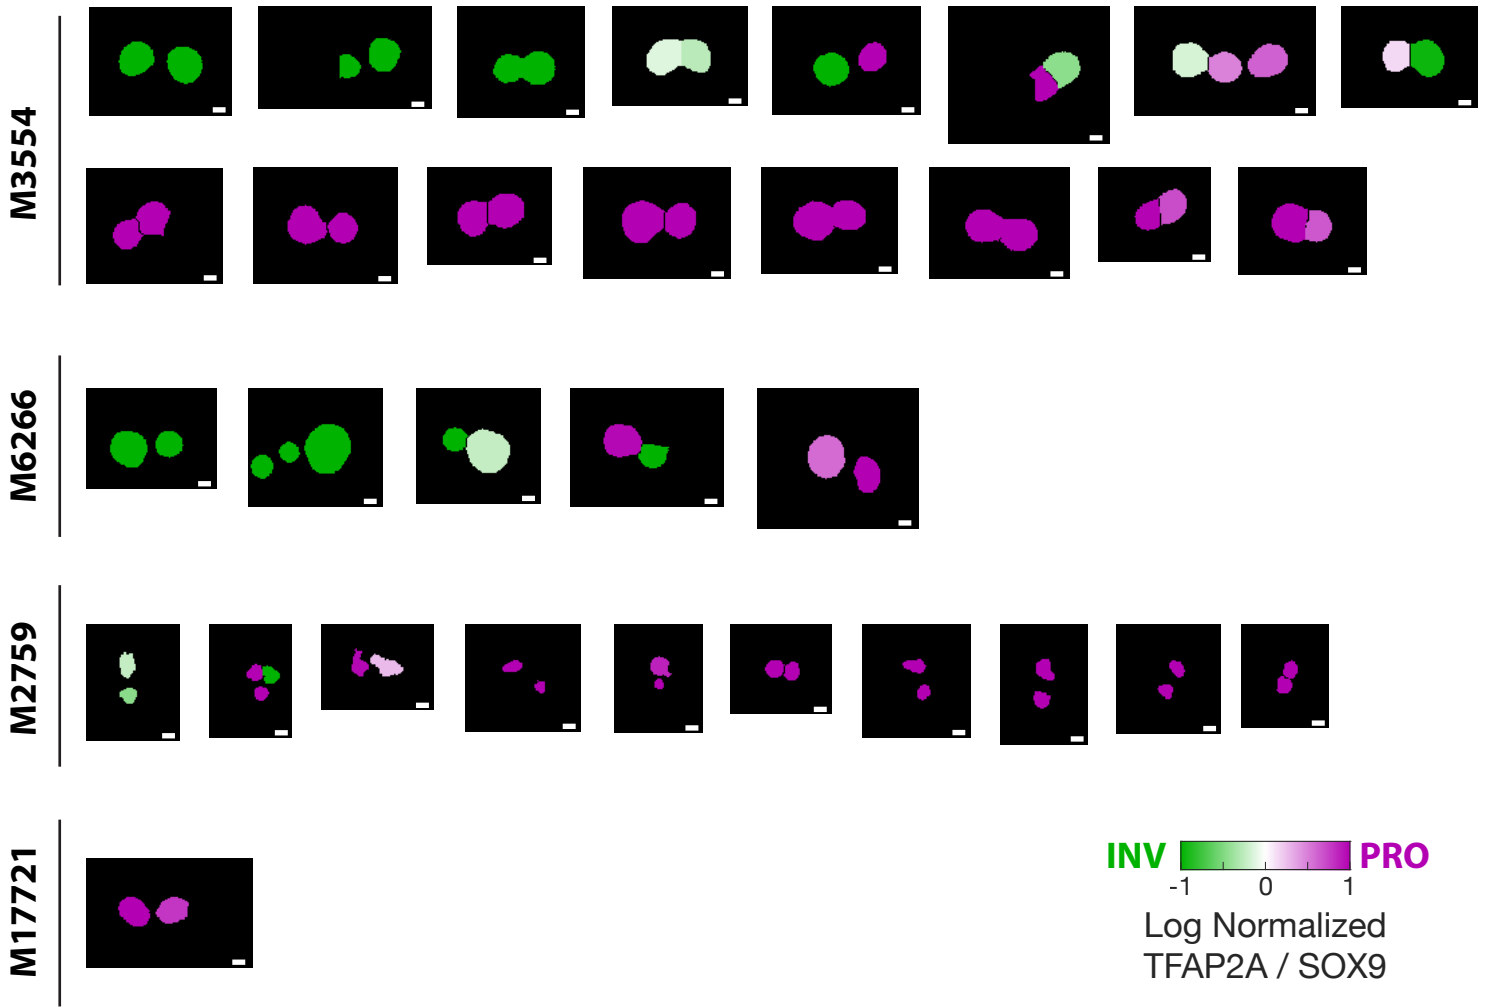

**Figure S6. PRO-INV heterotypic CTC clusters exist in the blood of melanoma patients**

**(Related to Figure 6)**

**a.** Nuclear quantification of TFAP2A and SOX9 in melanoma CTC clusters. n=32 clusters from four patients. Five additional patients were analyzed with no CTC clusters identified. Clusters were defined as two or more TFAP2A<sup>pos</sup>; CD45<sup>neg</sup> cells. DAPI staining was used to generate nuclear masks for quantification. Scale bar is 5µm.

**Figure S7**

**a**

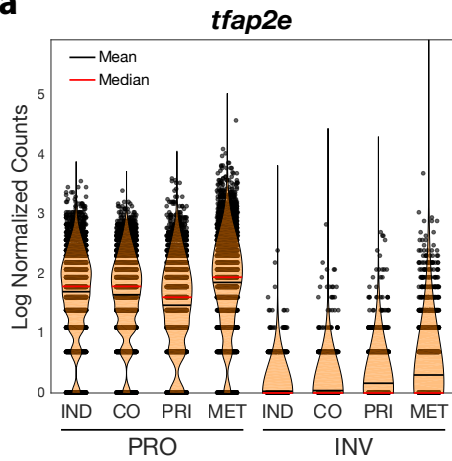

**b**

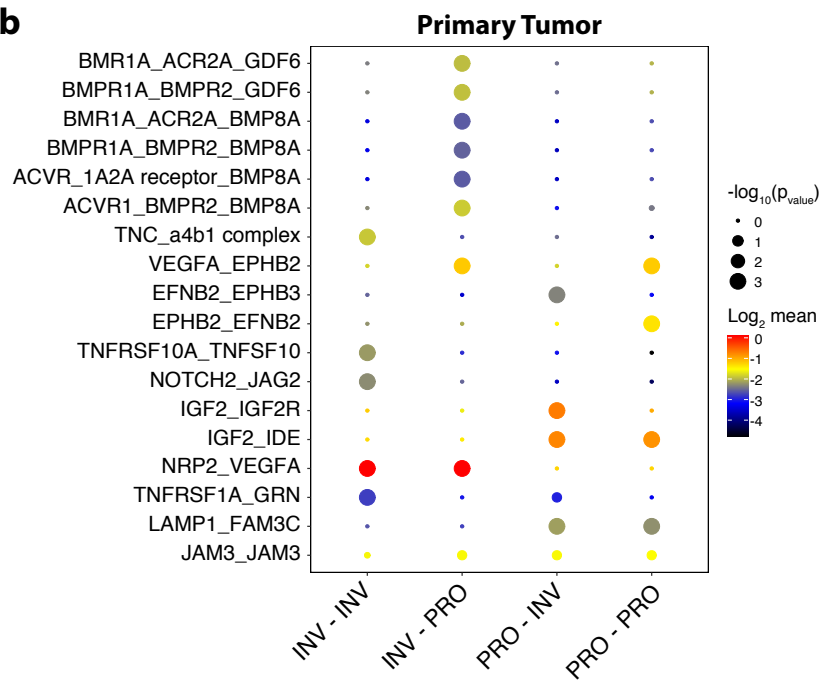

**c**

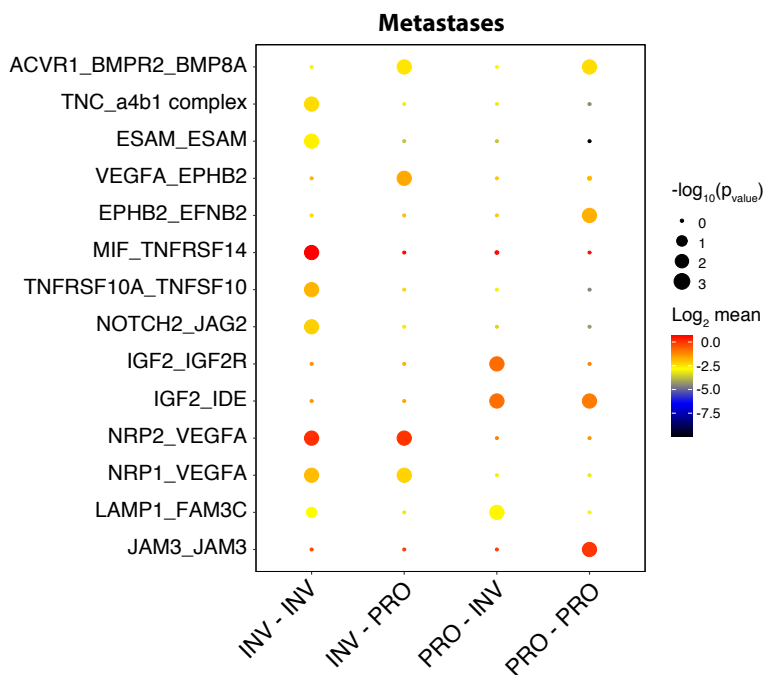

**Figure S7. Longitudinal single-cell RNA-seq reveals stability of PRO but not INV state  
(Related to Figure 7)**

**a.** Single-cell expression of *tfap2e* in ZMEL1-PRO and -INV cells. Individual culture (IND); co-culture (CO); primary tumors (PRI); metastases (MET). **b-c.** CellPhoneDB results indicating ligand-receptor pairs that are significantly enriched for the indicated cell-cell interactions in (b) primary tumors and (c) metastases comprised of both ZMEL1-PRO and -INV. Ligand-receptor pairings are listed in order of cell pairings on x-axis.

**Table S7. Melanoma patient CTC cluster statistics (Related to Figure 6)**

| Patient ID | Age Range | Sex | Mutation Status            | Months from sampling to death | Total number of clusters isolated | Number of PRO clusters | Number of PRO-INV clusters | Number of INV clusters |
|------------|-----------|-----|----------------------------|-------------------------------|-----------------------------------|------------------------|----------------------------|------------------------|
| M3554      | 61-65     | F   | BRAF <sup>L597Q</sup>      | 1                             | 16                                | 8                      | 4                          | 4                      |
| M6266      | 61-65     | M   | NRAS <sup>Q61K</sup>       | 0                             | 5                                 | 1                      | 1                          | 3                      |
| M2759      | 61-65     | F   | GNAQ <sup>Q209L</sup>      | 2                             | 10                                | 8                      | 1                          | 1                      |
| M17721     | 81-85     | M   | BRAF WT,<br>NRAS WT        | 3                             | 1                                 | 1                      | 0                          | 0                      |
| M2290      | 66-70     | M   | NRAS<br>mutation in exon 3 | 1                             | 0                                 | n/a                    | n/a                        | n/a                    |
| M6590      | 76-80     | M   | BRAF <sup>G466E</sup>      | 1                             | 0                                 | n/a                    | n/a                        | n/a                    |
| M9799      | 56-60     | M   | NRAS <sup>Q61K</sup>       | 6                             | 0                                 | n/a                    | n/a                        | n/a                    |
| M7579      | 66-70     | M   | BRAF <sup>V600K</sup>      | 1                             | 0                                 | n/a                    | n/a                        | n/a                    |
| M10803     | 81-85     | M   | BRAF WT,<br>NRAS WT        | 2                             | 0                                 | n/a                    | n/a                        | n/a                    |
